# Supplementary material for: Feasibility, reproducibility and diagnostic usefulness of right ventricular strain by 2-dimensional speckle-tracking echocardiography in ARDS patients: the ARD strain study
Source: Springer Nature journal article supplement (doi:10.1186/s13613-020-0636-2), 2020-02-13
Supplement: MOESM1 [file 17698810]

**Table S1: Control patients' characteristics**

| Parameter                                     | Control cohort (n=6)       | ARDS cohort (n=48)          | Comparison control vs ARDS patients |
|-----------------------------------------------|----------------------------|-----------------------------|-------------------------------------|
| Sex (M,%)                                     | 4 (67%)                    | 27 (56%)                    | 0.24 (Chi <sup>2</sup> )            |
| Age (years)                                   | 51 ± 8                     | 61 ± 17                     | 0.16                                |
| SOFA                                          | NA                         | 8 [7;11]                    | --                                  |
| APACHE II                                     | NA                         | 57 ± 15                     | --                                  |
| Weight (kg)                                   | NA                         | 75.7 ± 20.3                 | --                                  |
| Circulatory parameters                        |                            |                             |                                     |
| • SAP/MAP/DAP mmHg                            | 144 ± 16 / 96 ± 7 / 74 ± 7 | 114 ± 19 / 77 ± 10 / 57 ± 9 | 0.001 / <0.001 / <0.001             |
| • Heart rate bpm                              | 81 ± 19                    | 95 ± 22                     | 0.12                                |
| • Sinus rhythm                                | 6 (100%)                   | 42 (87.5%)                  |                                     |
| Ventilator settings                           |                            |                             |                                     |
| • Tidal volume, ml/kg of IBW                  | 8.5 ± 3.16                 | 6.9 ± 1.1                   | 0.01                                |
| • PEEP cmH2O                                  | 4.7 ± 0.5                  | 10.6 ± 2.9                  | <0.001                              |
| • autoPEEP cmH2O                              | 0.1 ± 0.1                  | 0.8 ± 1.2                   | 0.19                                |
| • Plateau pressure cmH2O                      | 14.8 ± 0.5                 | 23.2 ± 4.4                  | 0.001                               |
| • Driving pressure cmH2O                      | 10.1 ± 3.0                 | 12.4 ± 4.1                  | 0.31                                |
| • Respiratory rate /min                       | 18.5 ± 2.8                 | 24.0 ± 3.5                  | <0.001                              |
| Arterial blood gases                          |                            |                             |                                     |
| • FiO2 (%)                                    | 29 ± 6                     | 70 ± 21                     | <0.001                              |
| • pH                                          | 7.47 ± 0.06                | 7.31 ± 0.14                 | 0.01                                |
| • pCO2 mmHg                                   | 34.9 ± 3.7                 | 45.6 ± 11.1                 | 0.02                                |
| • pO2 mmHg                                    | 88.8 ± 19.0                | 83.6 ± 32.8                 | 0.71                                |
| • HCO3- mmol                                  | 25.0 ± 3.8                 | 22.1 ± 6.1                  | 0.27                                |
| • SaO2 %                                      | 96.7 ± 2.4                 | 93.5 ± 5.0                  | 0.14                                |
| • Lactate mmol                                | 1.0 ± 0.4                  | 2.1 ± 2.4                   | 0.34                                |
| • PaO2:FiO2 ratio                             | 323 ± 92                   | 126 ± 48                    | <0.001                              |
| Echocardiography                              |                            |                             |                                     |
| • RV STE-derived parameters                   |                            |                             |                                     |
| ○ RV Inferior LSS %                           | -25.7 ± 4.1                | -19.2 ± 7.0                 | 0.03                                |
| ○ RV Lateral LSS %                            | -27.7 ± 4.9                | -19.9 ± 6.4                 | 0.006                               |
| ○ RV Septal LSS %                             | -19.5 ± 4.2                | -13.9 ± 4.1                 | 0.003                               |
| ○ RV Global LSS %                             | -24.3 ± 3.4                | -17.7 ± 4.9                 | 0.002                               |
| ○ Global systolic strain rate s <sup>-1</sup> | -1.76 ± 0.37               | -1.37 ± 0.46                | 0.06                                |
| • RV conventional parameters                  |                            |                             |                                     |
| ○ TAPSE mm                                    | 24.2 ± 3.3                 | 18.7 ± 5.0                  | 0.01                                |
| ○ RV FAC %                                    | 47.0 ± 5.6                 | 39.5 ± 9.1                  | 0.05                                |
| ○ S' cm/s                                     | 18.0 ± 2.2                 | 12.7 ± 5.4                  | 0.03                                |
| ○ Acute cor pulmonale n (%)                   | 0 (0%)                     | 6 (12.5%)                   | 0.36 (Chi <sup>2</sup> )            |
| • LV parameters                               |                            |                             |                                     |
| ○ LVEF (Simpson's method) %                   | 64.1 ± 7.2                 | 55.2 ± 11.6                 | 0.07                                |
| ○ Cardiac output l/min                        | 9.2 ± 6.2                  | 5.7 ± 1.8                   | 0.003                               |
| ○ E/e'                                        | 6.2 ± 1.7                  | 8.2 ± 2.9                   | 0.15                                |

Median [interquartile range] ; mean ± standard deviation ; number (percentage)

Statistical test: Student t-test unless specified: Pearson Chi<sup>2</sup>

SOFA = sequential organ failure assessment score; APACHE II = Acute Physiology And Chronic Health Evaluation II; SAP-MAP-DAP = systolic-mean-diastolic arterial pressure; IBW = ideal body weight; PEEP = positive end-expiratory pressure; RV/LV = right/left ventricle; STE = speckle tracking echocardiography; LSS = longitudinal systolic strain; TAPSE = Tricuspid annular plane systolic excursion; FAC = Fractional area change; S' = Peak systolic velocity of tricuspid annulus by pulsed wave Doppler tissue imaging; EF = ejection fraction; E/e' = ratio between early mitral inflow velocity and mitral annular early diastolic velocity.

**Table S2: Feasibility**

|                                                                               | ARDS patients | Control patients |
|-------------------------------------------------------------------------------|---------------|------------------|
| Full STE examination (3 cardiac walls recorded with 3 cardiac cycles)         |               |                  |
| • Operator 1 (JL)                                                             | 81 (39)       | 83% (5)          |
| • Operator 2 (CHM)                                                            | 94% (45)      | 100% (6)         |
| • At least one operator with full examination                                 | 98% (47)      | 100% (6)         |
| 3-wall STE examination (3 cardiac walls recorded with $\geq 1$ cardiac cycle) |               |                  |
| • Operator 1                                                                  | 98% (47)      | 100% (6)         |
| • Operator 2                                                                  | 100% (48)     | 100% (6)         |
| RV inferior wall                                                              |               |                  |
| • 3 cardiac cycles                                                            |               |                  |
| o Operator 1                                                                  | 92% (44)      | 83% (5)          |
| o Operator 2                                                                  | 100% (48)     | 100% (6)         |
| • $\geq 1$ cardiac cycle                                                      |               |                  |
| o Operator 1                                                                  | 98% (47)      | 100% (6)         |
| o Operator 2                                                                  | 100% (48)     | 100% (6)         |
| RV lateral wall                                                               |               |                  |
| • 3 cardiac cycles                                                            |               |                  |
| o Operator 1                                                                  | 96% (46)      | 83% (5)          |
| o Operator 2                                                                  | 96% (46)      | 100% (6)         |
| • $\geq 1$ cardiac cycle                                                      |               |                  |
| o Operator 1                                                                  | 100% (48)     | 100% (6)         |
| o Operator 2                                                                  | 100% (48)     | 100% (6)         |
| Septal wall                                                                   |               |                  |
| • 3 cardiac cycles                                                            |               |                  |
| o Operator 1                                                                  | 98% (47)      | 100% (6)         |
| o Operator 2                                                                  | 98% (47)      | 100% (6)         |
| • $\geq 1$ cardiac cycle                                                      |               |                  |
| o Operator 1                                                                  | 100% (48)     | 100% (6)         |
| o Operator 2                                                                  | 100% (48)     | 100% (6)         |
| RV FAC                                                                        |               |                  |
| o Operator 1                                                                  | 100% (48)     | 83% (5)          |
| o Operator 2                                                                  | 100% (48)     | 100% (6)         |

STE = speckle tracking echocardiography; RV FAC = right ventricular fractional area change

**Table S3: Inter-observer reproducibility**

|                             | ARDS patients            |             |         | Control patients         |             |         |
|-----------------------------|--------------------------|-------------|---------|--------------------------|-------------|---------|
|                             | ICC coefficient [95% CI] | No of pairs | P value | ICC coefficient [95% CI] | No of pairs | P value |
| RV Inferior LSS             | 0.81 [0.68;0.89]         | 47          | <0.001  | 0.56 [-0.20;0.92]        | 6           | 0.08    |
| RV Lateral LSS              | 0.76 [0.58;0.86]         | 48          | <0.001  | 0.54 [-0.14;0.91]        | 6           | 0.05    |
| RV Septal LSS               | 0.81 [0.68;0.89]         | 48          | <0.001  | 0.74 [-0.04;0.96]        | 6           | 0.04    |
| RV Global LSS               | 0.87 [0.72;0.93]         | 47          | <0.001  | 0.81 [-0.02;0.98]        | 6           | 0.002   |
| Global systolic strain rate | 0.91 [0.84;0.95]         | 47          | <0.001  | 0.94 [0.67;0.99]         | 6           | 0.001   |
| RV FAC                      | 0.57 [0.35;0.73]         | 48          | 0.001   | 0.19 [-0.94;0.88]        | 6           | 0.37    |
| TAPSE                       | 0.88 [0.78;0.93]         | 48          | <0.001  |                          |             |         |
| S'                          | 0.94 [0.89;0.97]         | 48          | <0.001  |                          |             |         |

RV = right ventricle; LSS = longitudinal systolic strain; FAC = fractional area change; TAPSE = Tricuspid annular plane systolic excursion; S' = Peak systolic velocity of tricuspid annulus by pulsed wave Doppler tissue imaging

**Table S4: Diagnostic value of STE-derived parameters in discriminating RV dysfunction diagnosed by conventional parameters using classic cut-off values (ref 7)**

| STE-derived parameters of RV function | TAPSE (cut-off 17mm) |               |              | S' (cut-off 9.5cm/s) |               |              | RV FAC (cut-off 35%) |               |              | ED RV:LV >0.6 and at least 1 abnormal conventional parameter |               |              |
|---------------------------------------|----------------------|---------------|--------------|----------------------|---------------|--------------|----------------------|---------------|--------------|--------------------------------------------------------------|---------------|--------------|
|                                       | AUROC                | 95% CI        | p            | AUROC                | 95% CI        | p            | AUROC                | 95% CI        | p            | AUROC                                                        | 95% CI        | p            |
| RV inferior LSS                       | 0.726                | 0.574 – 0.878 | <b>0.009</b> | 0.729                | 0.544 - 0.915 | <b>0.03</b>  | 0.776                | 0.609 - 0.944 | <b>0.003</b> | 0.697                                                        | 0.547 - 0.847 | <b>0.02</b>  |
| RV Lateral LSS                        | 0.722                | 0.573 - 0.872 | <b>0.01</b>  | 0.801                | 0.656 - 0.945 | <b>0.005</b> | 0.811                | 0.648 - 0.974 | <b>0.001</b> | 0.724                                                        | 0.579 - 0.869 | <b>0.008</b> |
| RV Septal LSS                         | 0.685                | 0.519 - 0.852 | <b>0.03</b>  | 0.658                | 0.416 - 0.900 | 0.14         | 0.604                | 0.400 - 0.809 | 0.262        | 0.625                                                        | 0.462 - 0.788 | 0.14         |
| RV Global LSS                         | 0.759                | 0.614 – 0.904 | <b>0.002</b> | 0.772                | 0.593 - 0.952 | <b>0.01</b>  | 0.777                | 0.605 - 0.949 | <b>0.003</b> | 0.724                                                        | 0.577 - 0.871 | <b>0.008</b> |
| RV Global LSR                         | 0.638                | 0.462 - 0.813 | 0.11         | 0.758                | 0.554 - 0.962 | <b>0.02</b>  | 0.769                | 0.618 - 0.920 | <b>0.004</b> | 0.669                                                        | 0.516 - 0.823 | <b>0.04</b>  |

AUROC = area under Receiver Operating Characteristic; RV = right ventricle; STE = speckle tracking echocardiography; LSS = longitudinal systolic strain; LSR = longitudinal systolic strain rate; TAPSE = Tricuspid annular plane systolic excursion; FAC = Fractional area change; S' = Peak systolic velocity of tricuspid annulus by pulsed wave Doppler tissue imaging; ED RV:LV = end diastolic right ventricular over left ventricular diameter ratio.

**Table S5: Correlation between STE-derived and conventional parameters of RV function in ARDS patients**

|                                       | TAPSE           |        | S'              |        | RV FAC          |       |
|---------------------------------------|-----------------|--------|-----------------|--------|-----------------|-------|
|                                       | Correlation     | p      | Correlation     | p      | Correlation     | p     |
| STE-derived parameters of RV function |                 |        |                 |        |                 |       |
| RV inferior LSS                       | r = -0.337      | 0.019  | r = -0.294      | 0.042  | r = -0.362      | 0.012 |
| RV Lateral LSS                        | r = -0.424      | 0.003  | r = -0.464      | 0.001  | r = -0.393      | 0.006 |
| RV Septal LSS                         | r = -0.321      | 0.026  | r = -0.203      | 0.166  | r = -0.168      | 0.254 |
| RV Global LSS                         | r = -0.437      | 0.002  | r = -0.401      | 0.005  | r = -0.393      | 0.006 |
| Global systolic strain rate           | $\rho$ = -0.314 | 0.030  | $\rho$ = -0.630 | <0.001 | $\rho$ = -0.469 | 0.001 |
| Conventional parameters               |                 |        |                 |        |                 |       |
| TAPSE                                 |                 |        |                 |        |                 |       |
| S'                                    | r = 0.525       | <0.001 |                 |        |                 |       |
| RV FAC                                | r = 0.394       | 0.006  | r = 0.217       | 0.138  |                 |       |

RV = right ventricle; STE = speckle tracking echocardiography; LSS = longitudinal systolic strain; TAPSE = Tricuspid annular plane systolic excursion; FAC = Fractional area change; S' = Peak systolic velocity of tricuspid annulus by pulsed wave Doppler tissue imaging

**Table S6: Cut-off values for STE-derived parameters derived from control patients' echocardiography characteristics**

|                                               | Control patients  | Cut-offs (mean $\pm$ 2SD) |
|-----------------------------------------------|-------------------|---------------------------|
| RV STE-derived parameters                     |                   |                           |
| • RV Inferior LSS %                           | -25.70 $\pm$ 4.07 | -17.6                     |
| • RV Lateral LSS %                            | -27.66 $\pm$ 4.94 | -17.8                     |
| • RV Septal LSS %                             | -19.47 $\pm$ 4.19 | -11.1                     |
| • RV Global LSS %                             | -24.27 $\pm$ 3.44 | -17.4                     |
| • Global systolic strain rate s <sup>-1</sup> | -1.76 $\pm$ 0.37  | -1.02                     |
